# Supplementary material
Source: ML conference proceedings conference paper supplement (https://proceedings.mlr.press/v157/kang21a.html)
Supplement: Supplementary file 2 [file kang21a-supp.zip]

## Supplementary Material

### 1. Improving the First Class of Hashing Algorithms: Maximum Likelihood Estimators

The main goal is to prove **Theorem 1** stated in the main paper. We restate the procedure of maximum likelihood estimation here in this context.

Suppose we have  $k$  hashes, and define  $v_{ik}$  (equivalently  $v_{jk}, v_{wk}$ ) to be the respective values under the  $k^{\text{th}}$  hash. Consider the  $k^{\text{th}}$  triple given by  $(v_{ik}, v_{jk}, v_{wk})$ . There are only five possible sets of triples: a) all elements are equal, b) two elements are equal and the third is different, and c) all elements are distinct. Table 1 shows the different types of triples.

|          | $A$   | $B$       | $C$       | $D$       | $E$      |
|----------|-------|-----------|-----------|-----------|----------|
| $v_{is}$ | equal | different | equal     | equal     | distinct |
| $v_{js}$ | equal | equal     | different | equal     | distinct |
| $v_{ws}$ | equal | equal     | equal     | different | distinct |

Table 1: Table of possible triples.

Suppose we count the triples in each set and denote this as  $n_l$ , where  $l \in \{A, B, C, D, E\}$ , and  $p_l$  the probability of observing a triple falling in the set  $l$ . We note that  $n_A + n_B + n_C + n_D + n_E = k$ .

Since we have pre-computed  $d(\mathbf{x}_i, \mathbf{w})$  and  $d(\mathbf{x}_j, \mathbf{w})$ , and  $f^{(1)}$  is linear, we can invert this function to find the corresponding  $\rho_h(\mathbf{x}_i, \mathbf{w})$ ,  $\rho_h(\mathbf{x}_j, \mathbf{w})$ . Moreover, we can write  $p_A + p_C = \rho_h(\mathbf{x}_i, \mathbf{w})$ ,  $p_A + p_B = \rho_h(\mathbf{x}_j, \mathbf{w})$ ,  $p_A + p_D = \rho_h(\mathbf{x}_i, \mathbf{x}_j)$ , and  $p_A + p_B + p_C + p_D + p_E = 1$ . Finally, since  $d(\mathbf{x}_i, \mathbf{x}_j)$  is given by  $p_A + p_D$ , we write the log likelihood function  $\ell(p_A, p_B, p_C, p_D, p_E)$  in terms of  $p_A$  and  $p_D$ , and get

$$\begin{aligned} \ell(p_A, p_D) = & n_A \log(p_A) + n_B \log(\rho_h(\mathbf{x}_j, \mathbf{w}) - p_A) + n_C \log(\rho_h(\mathbf{x}_i, \mathbf{w}) - p_A) \\ & + n_D \log(p_D) + n_E \log(1 - \rho_h(\mathbf{x}_i, \mathbf{w}) - \rho_h(\mathbf{x}_j, \mathbf{w}) + p_A - p_D) \end{aligned} \quad (1)$$

as we want to compute the maximum likelihood estimate of  $\hat{p}_A + \hat{p}_D$  to give an estimate of  $\rho_h(\mathbf{x}_i, \mathbf{x}_j)$ .

**Theorem 1** Suppose we have a hashing algorithm where the estimate of interest is given by

$$\rho_h(\mathbf{x}_i, \mathbf{x}_j) = \mathbb{E}[f(Y^{(1)})] \quad (2)$$

where  $Y^{(1)}$  is a Bernoulli random variable,  $f$  is a linear function, and the output of the hashing algorithm takes discrete values. Suppose we add a weighted vector  $\mathbf{w}$ , and compute

the maximum likelihood estimate via (1). Then: a) this estimator is unbiased, and b) the asymptotic variance of this estimator is always lower than or equal to the variance of the estimate without using the MLE.

**Proof** In part a), the estimator is given by  $\hat{p}_A + \hat{p}_D$ . We can see that observe from Table 1 that sets  $A$  and  $D$  correspond to when the hashed values  $v_{is} = v_{js}$  for  $1 \leq s \leq k$ , and by definition, we have  $\rho_h(\mathbf{x}_i, \mathbf{x}_j) = \mathbb{P}[v_i = v_j]$ , hence by the law of large numbers,  $\sum_{s=1}^k 1_{\{v_{is}=v_{js}\}}/k \approx \rho_h(\mathbf{x}_i, \mathbf{x}_j)$  and hence this estimator is unbiased.

We now prove part b).

Recall that for random variables  $Y_1, Y_2, \dots, Y_k$ , we have that

$$\text{Var}\left[\frac{Y_1 + \dots + Y_k}{k}\right] = \frac{1}{k^2} \left( \sum_{s=1}^k \text{Var}[Y_s] + 2 \sum_{s \geq t} \text{Cov}(Y_s, Y_t) \right) \quad (3)$$

In the original case without any modifications, we have  $Y_s := 1_{\{v_{is}=v_{js}\}}$  for  $1 \leq s \leq k$ , and each  $Y_s$  are i.i.d. from a Bernoulli distribution.

Hence with  $k$  hashes, we must have

$$\text{Var}\left[\frac{Y_1 + \dots + Y_k}{k}\right] = \frac{1}{k^2} \left( \sum_{s=1}^k \text{Var}[Y_s] \right) \quad (4)$$

$$= \frac{\text{Var}[1_{\{v_i=v_j\}}]}{k} \quad (5)$$

$$= \frac{(p_A + p_D)(p_B + p_C + p_E)}{k} \quad (6)$$

Suppose we now look at our new estimator, where we make use of the pre-computed values. From Equation (1), we can compute the partial derivatives to be

$$\frac{\partial \ell}{\partial p_A} = \frac{n_A}{p_A} + \frac{n_B}{p_A - \rho_h(\mathbf{x}_j, \mathbf{w})} + \frac{n_C}{p_A - \rho_h(\mathbf{x}_i, \mathbf{w})} + \frac{n_E}{1 + p_A - p_D - \rho_h(\mathbf{x}_i, \mathbf{w}) - \rho_h(\mathbf{x}_j, \mathbf{w})} \quad (7)$$

$$\frac{\partial \ell}{\partial p_D} = \frac{n_D}{p_D} - \frac{n_E}{1 + p_A - p_D - \rho_h(\mathbf{x}_i, \mathbf{w}) - \rho_h(\mathbf{x}_j, \mathbf{w})} \quad (8)$$

and Hessian matrix of second partial derivatives as

$$\begin{aligned} H &= \begin{pmatrix} -\frac{n_A}{p_A^2} - \frac{n_B}{(\rho_h(\mathbf{x}_j, \mathbf{w}) - p_A)^2} - \frac{n_C}{(\rho_h(\mathbf{x}_i, \mathbf{w}) - p_A)^2} - \frac{n_E}{(1 - \rho_h(\mathbf{x}_i, \mathbf{w}) - \rho_h(\mathbf{x}_j, \mathbf{w}) + p_A - p_D)^2} & \frac{n_E}{(1 - \rho_h(\mathbf{x}_i, \mathbf{w}) - \rho_h(\mathbf{x}_j, \mathbf{w}) + p_A - p_D)^2} \\ \frac{n_E}{(1 - \rho_h(\mathbf{x}_i, \mathbf{w}) - \rho_h(\mathbf{x}_j, \mathbf{w}) + p_A - p_D)^2} & -\frac{n_E}{(1 - \rho_h(\mathbf{x}_i, \mathbf{w}) - \rho_h(\mathbf{x}_j, \mathbf{w}) + p_A - p_D)^2} - \frac{n_D}{p_D^2} \end{pmatrix} \\ &= \begin{pmatrix} -\frac{n_A}{p_A^2} - \frac{n_B}{p_B^2} - \frac{n_C}{p_C^2} - \frac{n_E}{p_E^2} & -\frac{n_D}{p_D^2} - \frac{n_E}{p_E^2} \\ -\frac{n_D}{p_D^2} - \frac{n_E}{p_E^2} & -\frac{n_D}{p_D^2} - \frac{n_E}{p_E^2} \end{pmatrix} \quad (9) \end{aligned}$$

From the Hessian, we can compute the expected Fisher Information  $\mathcal{I}$  of  $p_A$  and  $p_D$  given by

$$\mathcal{I} = -\mathbb{E}[H] \quad (10)$$

$$= \begin{pmatrix} \frac{\mathbb{E}[n_A]}{p_A^2} + \frac{\mathbb{E}[n_B]}{p_B^2} + \frac{\mathbb{E}[n_C]}{p_C^2} + \frac{\mathbb{E}[n_E]}{p_E^2} & -\frac{\mathbb{E}[n_E]}{p_E^2} \\ -\frac{\mathbb{E}[n_E]}{p_E^2} & \frac{\mathbb{E}[n_D]}{p_D^2} + \frac{\mathbb{E}[n_E]}{p_E^2} \end{pmatrix} \quad (11)$$

$$= \begin{pmatrix} \frac{kp_A}{p_A^2} + \frac{kp_B}{p_B^2} + \frac{kp_C}{p_C^2} + \frac{kp_E}{p_E^2} & -\frac{kp_E}{p_E^2} \\ -\frac{kp_E}{p_E^2} & \frac{kp_D}{p_D^2} + \frac{kp_E}{p_E^2} \end{pmatrix} \quad (12)$$

$$= k \begin{pmatrix} \frac{1}{p_A} + \frac{1}{p_B} + \frac{1}{p_C} + \frac{1}{p_E} & -\frac{1}{p_E} \\ -\frac{1}{p_E} & \frac{1}{p_D} + \frac{1}{p_E} \end{pmatrix} \quad (13)$$

Now,  $\begin{pmatrix} \hat{p}_A \\ \hat{p}_D \end{pmatrix}$  converges in distribution to a bivariate normal random variable  $N\left(\begin{pmatrix} p_A \\ p_D \end{pmatrix}, \mathcal{I}^{-1}\right)$ , where

$$\mathcal{I}^{-1} = \frac{1}{k \left[ \left( \frac{1}{p_A} + \frac{1}{p_B} + \frac{1}{p_C} + \frac{1}{p_E} \right) \left( \frac{1}{p_D} + \frac{1}{p_E} \right) - \frac{1}{p_E^2} \right]} \begin{pmatrix} \frac{1}{p_D} + \frac{1}{p_E} & \frac{1}{p_E} \\ \frac{1}{p_E} & \frac{1}{p_A} + \frac{1}{p_B} + \frac{1}{p_C} + \frac{1}{p_E} \end{pmatrix} \quad (14)$$

We can now write the variance of our new estimator as

$$\text{Var}[\hat{p}_A + \hat{p}_D] = \text{Var}[\hat{p}_A] + \text{Var}[\hat{p}_D] + 2\text{Cov}[\hat{p}_A, \hat{p}_D] \quad (15)$$

$$= \frac{\left( \left( \frac{1}{p_D} + \frac{1}{p_E} \right) + \left( \frac{1}{p_A} + \frac{1}{p_B} + \frac{1}{p_C} + \frac{1}{p_E} \right) + \frac{2}{p_E} \right)}{k \left[ \left( \frac{1}{p_A} + \frac{1}{p_B} + \frac{1}{p_C} + \frac{1}{p_E} \right) \left( \frac{1}{p_D} + \frac{1}{p_E} \right) - \frac{1}{p_E^2} \right]} \quad (16)$$

$$= \frac{\frac{1}{p_A} + \frac{1}{p_B} + \frac{1}{p_C} + \frac{1}{p_D} + \frac{4}{p_E}}{k \left[ \left( \frac{1}{p_A} + \frac{1}{p_B} + \frac{1}{p_C} + \frac{1}{p_E} \right) \left( \frac{1}{p_D} + \frac{1}{p_E} \right) - \frac{1}{p_E^2} \right]} \quad (17)$$

Finally, we want to show that the asymptotic variance of this estimator is always lower than or equal to the variance of the original estimator, which is equivalent to showing that

$$(p_A + p_D)(p_B + p_C + p_E) - \frac{\frac{1}{p_A} + \frac{1}{p_B} + \frac{1}{p_C} + \frac{1}{p_D} + \frac{4}{p_E}}{\left( \frac{1}{p_A} + \frac{1}{p_B} + \frac{1}{p_C} + \frac{1}{p_E} \right) \left( \frac{1}{p_D} + \frac{1}{p_E} \right) - \frac{1}{p_E^2}} \geq 0 \quad (18)$$

Suppose we let

$$A := (p_A + p_D)(p_B + p_C + p_E) \left[ \left( \frac{1}{p_A} + \frac{1}{p_B} + \frac{1}{p_C} + \frac{1}{p_E} \right) \left( \frac{1}{p_D} + \frac{1}{p_E} \right) - \frac{1}{p_E^2} \right] \quad (19)$$

$$B := \frac{1}{p_A} + \frac{1}{p_B} + \frac{1}{p_C} + \frac{1}{p_D} + \frac{4}{p_E} \quad (20)$$

We then want to show that  $A \geq B$  for all values of  $p_A, p_B, p_C, p_D, p_E$ .

The key idea here is to replace the "1" terms by  $p_A + p_B + p_C + p_D + p_E$  whenever they occur.

Note that  $A$  remains unchanged, because we can write

$$A := \frac{(p_A + p_D)}{1} \frac{(p_B + p_C + p_E)}{1} \left[ \left( \frac{1}{p_A} + \frac{1}{p_B} + \frac{1}{p_C} + \frac{1}{p_E} \right) \left( \frac{1}{p_D} + \frac{1}{p_E} \right) - \frac{1}{p_E^2} \right] \quad (21)$$

and the  $p_A + p_B + p_C + p_D + p_E$  terms cancel.

However,  $B$  now becomes

$$B := \frac{p_A + p_B + p_C + p_D + p_E}{p_A} + \frac{p_A + p_B + p_C + p_D + p_E}{p_B} + \frac{p_A + p_B + p_C + p_D + p_E}{p_C} \\ + \frac{p_A + p_B + p_C + p_D + p_E}{p_D} + \frac{4(p_A + p_B + p_C + p_D + p_E)}{p_E} \quad (22)$$

Now, we need to show that  $A - B \geq 0$  for all  $0 \leq p_A, p_B, p_C, p_D, p_E \leq 1$ . We first write

$$A - B = \frac{C}{p_A p_B p_C p_D p_E} \quad (23)$$

where

$$C = (p_A - p_D)^2 (p_B + p_C) p_B p_C + (p_B - p_C)^2 (p_A + p_D) p_A p_D \\ + p_A p_E (p_A (p_B + p_C) (p_B + p_C + p_E) - 4 p_B p_C p_D) \quad (24)$$

$$= \alpha p_D^2 + \beta p_D + \gamma \quad (25)$$

as a quadratic in  $p_D$  by replacing  $p_E$  by  $1 - p_A - p_B - p_C - p_D$ , with

$$\alpha = (p_A + p_B)(p_A + p_C)(p_B + p_C) \quad (26)$$

$$\beta = 2p_A(p_B p_C(p_B + p_C - 2) + p_A^2(p_B + p_C) + p_A(p_B + p_C - 1)(p_B + p_C)) \quad (27)$$

$$\gamma = p_A^2(p_A + p_B - 1)(p_A + p_C - 1)(p_B + p_C) \quad (28)$$

We can complete the square in our quadratic at (25) and get

$$C = \alpha \left( p_D + \frac{\beta}{2\alpha} \right)^2 - \frac{\beta^2}{4\alpha} + \gamma \quad (29)$$

and now we just need to show that that

$$-\frac{\beta^2}{4\alpha} + \gamma \geq 0 \quad (30)$$

which is a term in  $p_A, p_B$  and  $p_C$ . The left hand side of (30) gives

$$\frac{p_A^2(p_B - p_C)^2(p_A p_B(1 - p_A - p_B) + p_A p_C(1 - p_A - p_C) + p_B p_C(1 - p_B - p_C) - 2p_A p_B p_C)}{(p_A + p_B)(p_A + p_C)(p_B + p_C)} \quad (31)$$

but we note that since  $p_A + p_B + p_C + p_D + p_E = 1$ , we can write the third factor of the numerator of (31) as

$$p_A p_B(p_C + p_D + p_E) + p_A p_C(p_B + p_D + p_E) + p_B p_C(p_A + p_D + p_E) - 2p_A p_B p_C \quad (32)$$

and hence note we have a common factor of  $p_{APB}p_C$  which cancels out when we expand (32)

$$(p_{APB} + p_{APC} + p_{BPC})(p_D + p_E) + p_{APB}p_C \quad (33)$$

which is always non-negative. We can hence write (31) as

$$\frac{p_A^2(p_B - p_C)^2((p_{APB} + p_{APC} + p_{BPC})(p_D + p_E) + p_{APB}p_C)}{(p_A + p_B)(p_A + p_C)(p_B + p_C)} \geq 0 \quad (34)$$

which implies that (25) is always non-negative, and thus

$$(p_A + p_D)(p_B + p_C + p_E) - \frac{\frac{1}{p_A} + \frac{1}{p_B} + \frac{1}{p_C} + \frac{1}{p_D} + \frac{4}{p_E}}{\left(\frac{1}{p_A} + \frac{1}{p_B} + \frac{1}{p_C} + \frac{1}{p_E}\right)\left(\frac{1}{p_D} + \frac{1}{p_E}\right) - \frac{1}{p_E^2}} \geq 0 \quad (35)$$

with equality when  $p_B = p_C$  and  $p_D = p_A(1 - p_A - p_B)/(p_A + p_B)$ .

This completes the proof. ■

### 1.1. Random Projections and Very Sparse Random Projections

We prove the following theorem

**Theorem 2** Suppose  $\mathbf{w}_1, \dots, \mathbf{w}_S$  are chosen to be pairwise orthogonal. With the estimator  $v_i v_j$ , we can write the control variate

$$Z = \sum_{s,t} \alpha_{s,t} v_{\mathbf{w}_s} v_{\mathbf{w}_t} \quad (36)$$

with  $\alpha_{s,t} = d(\mathbf{x}_i, \mathbf{w}_s)d(\mathbf{x}_j, \mathbf{w}_t) + d(\mathbf{x}_i, \mathbf{w}_t)d(\mathbf{x}_j, \mathbf{w}_s)$ , with control variate correction  $\hat{c} = -\frac{1}{2}$ .

**Proof** For each hash, our estimate of the inner product  $\hat{\theta}$  can be written as

$$\hat{\theta} = v_i v_j + \hat{c} \sum_{s,t} \alpha_{s,t} (v_{\mathbf{w}_s} v_{\mathbf{w}_t} - \mathbb{E}[v_{\mathbf{w}_s} v_{\mathbf{w}_t}]) \quad (37)$$

The variance of our estimates can hence be written as

$$\text{Var}[\hat{\theta}] = \text{Var}[v_i v_j + \hat{c} \sum_{s,t} \alpha_{s,t} v_{\mathbf{w}_s} v_{\mathbf{w}_t}] \quad (38)$$

$$\begin{aligned} &= \text{Var}[v_i v_j] + \hat{c}^2 \sum_{s,t} \alpha_{s,t}^2 \text{Var}[v_{\mathbf{w}_s} v_{\mathbf{w}_t}] + 2\hat{c} \sum_{s,t} \alpha_{s,t} \text{Cov}(v_i v_j, v_{\mathbf{w}_s} v_{\mathbf{w}_t}) \\ &\quad + 2\hat{c} \sum_{s,t,m,n} \alpha_{s,t} \alpha_{m,n} \text{Cov}(v_{\mathbf{w}_m} v_{\mathbf{w}_n}, v_{\mathbf{w}_s} v_{\mathbf{w}_t}) \end{aligned} \quad (39)$$

Suppose we bring in  $\hat{c}$  into the  $\alpha$ s, i.e. set  $\tilde{\alpha} = \hat{c}\alpha$ , and we map each of the tuples  $(s, t)$  to  $k \in \{1, 2, \dots, S(S-1)/2\}$ . Then we can rewrite the above equation to get

$$\text{Var}[\hat{\theta}] = \text{Var}[v_i v_j + \sum_k \alpha_k v_{\mathbf{w}_s} v_{\mathbf{w}_t}] \quad (40)$$

$$\begin{aligned} &= \text{Var}[v_i v_j] + \sum_k \alpha_k^2 \text{Var}[v_{\mathbf{w}_s} v_{\mathbf{w}_t}] + 2 \sum_k \alpha_k \text{Cov}(v_i v_j, v_{\mathbf{w}_s} v_{\mathbf{w}_t}) \\ &\quad + 2 \sum_{k,k'} \alpha_k \alpha_{k'} \text{Cov}(v_{\mathbf{w}_m} v_{\mathbf{w}_n}, v_{\mathbf{w}_s} v_{\mathbf{w}_t}) \end{aligned} \quad (41)$$

Then if we take partial derivatives with respect to  $\alpha_s$ , we have for some arbitrary  $\alpha_k$  term

$$\begin{aligned} \frac{\partial \text{Var}[\hat{\theta}]}{\partial \alpha_k} &= 2\alpha_k \text{Var}[v_{\mathbf{w}_s} v_{\mathbf{w}_t}] + 2 \text{Cov}(v_i v_j, v_{\mathbf{w}_s} v_{\mathbf{w}_t}) \\ &\quad + 2 \sum_{k' \neq k} \alpha_{k'} \text{Cov}(v_{\mathbf{w}_m} v_{\mathbf{w}_n}, v_{\mathbf{w}_s} v_{\mathbf{w}_t}) \end{aligned} \quad (42)$$

Since we know the weighted vectors are chosen to be orthogonal to each other, then  $\text{Cov}(v_{\mathbf{w}_m} v_{\mathbf{w}_n}, v_{\mathbf{w}_s} v_{\mathbf{w}_t}) = 0$  if  $(m, n) \neq (s, t)$  (or  $(m, n) \neq (t, s)$ ). Hence (42) simplifies to

$$\frac{\partial \text{Var}[\hat{\theta}]}{\partial \alpha_k} = 2\alpha_k \text{Var}[v_{\mathbf{w}_s} v_{\mathbf{w}_t}] + 2 \text{Cov}(v_i v_j, v_{\mathbf{w}_s} v_{\mathbf{w}_t}) \quad (43)$$

and equating this to zero, we must have that

$$\alpha_k = -\text{Cov}(v_i, v_j, v_{\mathbf{w}_s} v_{\mathbf{w}_t}) / \text{Var}[v_{\mathbf{w}_s} v_{\mathbf{w}_t}] \quad (44)$$

Since  $v_i$ s are distributed multivariate normal, and  $\mathbf{x}_i$ s and the weighted vectors are normalized to unit length 1, then any

$$\text{Cov}(v_i v_j, v_k v_l) = d(\mathbf{x}_j, \mathbf{x}_k) d(\mathbf{x}_i, \mathbf{x}_l) + d(\mathbf{x}_j, \mathbf{x}_l) d(\mathbf{x}_i, \mathbf{x}_k) \quad (45)$$

and in general we get

$$\alpha_k = -\frac{1}{2} d(\mathbf{x}_j, \mathbf{x}_k) d(\mathbf{x}_i, \mathbf{x}_l) + d(\mathbf{x}_j, \mathbf{x}_l) d(\mathbf{x}_i, \mathbf{x}_k) \quad (46)$$

Since we brought  $\hat{c}$  into the  $\alpha$ s, we thus have the optimal control variate coefficient and terms to be

$$\hat{c} = \frac{1}{2} \quad \alpha_{i,j} = d(\mathbf{x}_j, \mathbf{x}_k) d(\mathbf{x}_i, \mathbf{x}_l) + d(\mathbf{x}_j, \mathbf{x}_l) d(\mathbf{x}_i, \mathbf{x}_k) \quad (47)$$

or in general, any form of

$$\hat{c} = \frac{1}{2} \beta \quad \alpha_{i,j} = \frac{1}{\beta} d(\mathbf{x}_j, \mathbf{x}_k) d(\mathbf{x}_i, \mathbf{x}_l) + d(\mathbf{x}_j, \mathbf{x}_l) d(\mathbf{x}_i, \mathbf{x}_k) \quad (48)$$

for any  $\beta \in \mathbb{R}$ . ■
